# Supplementary material for: Density, viscosity and electrical conductivity of protic alkanolammonium ionic liquids
Source: Royal Society of Chemistry journal article supplement (doi:10.1039/c0cp02222e), 2011-01-01
Supplement: esi_1.pdf [file esi_1.pdf]

# Density, viscosity and electrical conductivity of alkanolammonium ionic liquids

André Pinkert, Keng L. Ang, Kenneth N. Marsh\*, and Shusheng Pang

## ELECTRONIC SUPPLEMENTARY INFORMATION

**Table 1 Decomposition temperatures of alkanolammonium ILs<sup>1</sup>  
at a fractional mass loss of 0.1 at two different heating rates  
 $\dot{T}_{1K} = 1 \text{ K}\cdot\text{min}^{-1}$  and  $\dot{T}_{10K} = 10 \text{ K}\cdot\text{min}^{-1}$**

|     | [DAA]<br>$t_{1K}/^{\circ}\text{C}, t_{10K}/^{\circ}\text{C}$ | [HEA]<br>$t_{1K}/^{\circ}\text{C}, t_{10K}/^{\circ}\text{C}$ | [HPA]<br>$t_{1K}/^{\circ}\text{C}, t_{10K}/^{\circ}\text{C}$ | [DEA]<br>$t_{1K}/^{\circ}\text{C}, t_{10K}/^{\circ}\text{C}$ | [TEA]<br>$t_{1K}/^{\circ}\text{C}, t_{10K}/^{\circ}\text{C}$ |
|-----|--------------------------------------------------------------|--------------------------------------------------------------|--------------------------------------------------------------|--------------------------------------------------------------|--------------------------------------------------------------|
| Fmt | 50, 90                                                       | 63, 111                                                      | 100, 151                                                     | 120, 158                                                     | 110, 154                                                     |
| Ac  | 38, 62                                                       | 95, 132                                                      | 100, 142                                                     | 106, 144                                                     | 84, 119                                                      |
| Mal | 61, 98                                                       | 108, 136                                                     | 108, 141                                                     | 97, 142                                                      | 106, 136                                                     |

## References

- <sup>1</sup> A. Pinkert, K. N. Marsh and S. Pang, *Ind. Eng. Chem. Res.*, 2010, DOI: 10.1021/ie101250v.

*Department of Chemical and Process Engineering, University of Canterbury,  
Christchurch, New Zealand. Fax: +64 3364 2063. Tel: +1 480 802 8911.  
E-mail: ken@kbmarsh.com.*
