# Supplementary material for: Density, viscosity and electrical conductivity of protic alkanolammonium ionic liquids
Source: Royal Society of Chemistry journal article supplement (doi:10.1039/c0cp02222e), 2011-01-01
Supplement: esi_2.pdf [file esi_2.pdf]

**Table S1 Summary of relevant experimental information on reported measurements of the density, viscosity and electrical conductivity of alkanolammonium ionic liquids (ILs)**

| Reference                                                                   | Ionic Liquid     | Synthesis                                                                                                                                                                           | Water mass fraction $w$ |                    | Instruments                                                                                                                                                                                                                |                                                                                                                                                                  |                                                                                           | Comments                                                                                                                                                                |
|-----------------------------------------------------------------------------|------------------|-------------------------------------------------------------------------------------------------------------------------------------------------------------------------------------|-------------------------|--------------------|----------------------------------------------------------------------------------------------------------------------------------------------------------------------------------------------------------------------------|------------------------------------------------------------------------------------------------------------------------------------------------------------------|-------------------------------------------------------------------------------------------|-------------------------------------------------------------------------------------------------------------------------------------------------------------------------|
|                                                                             |                  |                                                                                                                                                                                     | before measurements     | after measurements | Density                                                                                                                                                                                                                    | Viscosity                                                                                                                                                        | Electrical conductivity                                                                   |                                                                                                                                                                         |
| Bicak <i>J. Mol. Liq.</i> <b>2005</b> , <i>116</i> , 15-18.                 | [HEA]Fmt         | open atmosphere, no drying                                                                                                                                                          | n.a.                    | n.a.               | n.a.                                                                                                                                                                                                                       | Canon-Fenske viscometer                                                                                                                                          | WTW Multiline P3 with TetraCon 325 electrode                                              | no temperature given for density value                                                                                                                                  |
| Kurnia et al. <i>J. Chem. Thermodyn.</i> <b>2009</b> , <i>41</i> , 517-521. | [HEA]Ac, [DEA]Ac | educts distilled, N <sub>2</sub> atmosphere, equimolar amounts of educts used, stir at 50 °C for (24 to 36) h, subsequent thin layer chromatography, subsequent vacuum distillation | $< 0.38 \cdot 10^{-5}$  | n.a.               | Anton Paar Oscillating U-tube (DMA-5000), absolute uncertainty $\pm 2 \cdot 10^{-2} \text{ kg} \cdot \text{m}^{-3}$ , calibrated with Millipore water and other ILs, absolute temperature uncertainty $\pm 0.01 \text{ K}$ | cone and plate Brookfield (CAP 2000, L-series), average of three measurements agreeing to within 10 MPa·s, absolute temperature uncertainty $\pm 0.01 \text{ K}$ | not measured                                                                              | ILs stirred under N <sub>2</sub> atmosphere, open atmosphere during measurements, no degassing mentioned, viscosity is given in MPa·s: probably typo and mPa·s is meant |
| Zhao et al. <i>J. Chem. Phys. B</i> <b>2008</b> , <i>112</i> , 6923-6936.   | [DEA]Ac          | amine diluted in solvent (water or methanol), equimolar ratio, solvent removal under vacuum, azeotropic water removal with toluene, final drying                                    | $< 0.2 \cdot 10^{-2}$   | n.a.               | weigh sample on volumetric flask, relative uncertainty $\pm 1 \%$                                                                                                                                                          | Schott micro-Ubbelohde capillary viscometer                                                                                                                      | impedance measurement at 25 °C at (0.1 and 1) MHz with a Solartron 1260 response analyzer | no information about atmosphere during measurements                                                                                                                     |

at 0.03 mbar for 24 h

|                                                                                        |                                    |                                                                                                                                                                            |                        |      |                                                                                                                                             |                                                                                      |                                                                                                                                                                                                                                              |                                                                                                                                                                                                                       |
|----------------------------------------------------------------------------------------|------------------------------------|----------------------------------------------------------------------------------------------------------------------------------------------------------------------------|------------------------|------|---------------------------------------------------------------------------------------------------------------------------------------------|--------------------------------------------------------------------------------------|----------------------------------------------------------------------------------------------------------------------------------------------------------------------------------------------------------------------------------------------|-----------------------------------------------------------------------------------------------------------------------------------------------------------------------------------------------------------------------|
| Cota et al.<br><i>J. Phys. Chem. B</i><br><b>2007</b> , 111,<br>12468-<br>12477.       | [HEA]Fmt,<br>[DEA]Fmt,<br>[TEA]Fmt | stir at r.t. for 24 h,<br>heat for 24 h to<br>evaporize unreacted<br>acid, stored at<br>constant humidity,<br>degassing with<br>ultrasound, drying<br>with molecular sieve | n.a.                   | n.a. | Anton Paar DSA-<br>5000 vibrational<br>tube, calibration<br>with Millipore<br>water, absolute<br>temperature<br>uncertainty<br>$\pm 0.01$ K | not measured                                                                         | Jenway model<br>4150<br>conductivity/TDS<br>meter, relative<br>uncertainty<br>$\pm 0.5$ %, absolute<br>temperature<br>uncertainty<br>$\pm 0.5$ K                                                                                             | no information<br>about atmosphere<br>during<br>measurements,<br>wrong names for<br>[DEA] and [TEA]<br>given, however<br>educts and<br>molecular weights<br>suggest that [DEA]<br>and [TEA]<br>compounds are<br>meant |
| Greaves et<br>al.<br><i>J. Phys. Chem. B</i><br><b>2006</b> , 110,<br>22479-<br>22487. | [HEA]Fmt,<br>[HEA]Ac               | equimolar amounts<br>of educts used ,<br>drying at 0.01 mbar,<br>subsequent freeze<br>drying, formation of<br>amide byproducts<br>determined by NMR                        | $< 0.55 \cdot 10^{-2}$ | n.a. | specific gravity<br>bottle                                                                                                                  | Carri-Med CSL2<br>100 Controlled<br>Stress<br>Rheometer,<br>cone and plate<br>method | CDC 104 electrode<br>with CDM 83<br>conductivity<br>meter, or Inlab r<br>730-laboratory<br>conductive<br>electrode with<br>Mettler Toledo<br>Seven Multi<br>conductivity<br>meter, calibrated<br>against standards<br>from Mettler<br>Toledo | no information<br>about atmosphere<br>during<br>measurements                                                                                                                                                          |
| Greaves et<br>al.<br><i>J. Phys. Chem. B</i>                                           | [HEA]Fmt,<br>[DEA]Fmt              | equimolar amounts<br>of educts used ,<br>drying at 0.01 mbar,<br>subsequent freeze                                                                                         | $< 1.41 \cdot 10^{-2}$ | n.a. | n.a.                                                                                                                                        | n.a.                                                                                 | n.a.                                                                                                                                                                                                                                         | no information<br>about atmosphere<br>during<br>measurements, no                                                                                                                                                      |

|                                                                                               |                                  |                                                                                                                                                                                                                                                                   |                        |      |                                                               |                                                                             |                                                                                                          |                                                                                                                        |
|-----------------------------------------------------------------------------------------------|----------------------------------|-------------------------------------------------------------------------------------------------------------------------------------------------------------------------------------------------------------------------------------------------------------------|------------------------|------|---------------------------------------------------------------|-----------------------------------------------------------------------------|----------------------------------------------------------------------------------------------------------|------------------------------------------------------------------------------------------------------------------------|
| <b>2010</b> , 114,<br>10022-<br>10031.                                                        |                                  | drying                                                                                                                                                                                                                                                            |                        |      |                                                               |                                                                             |                                                                                                          | temperatures for<br>measurements<br>given                                                                              |
| Burrell et al.<br><i>Phys. Chem.</i><br><i>Chem. Phys.</i><br><b>2010</b> , 12,<br>1571-1577. | [DEA]Fmt,<br>[DEA]Ac             | amines purified via<br>fractional distillation,<br>formic acid distilled<br>over CaH <sub>2</sub> , glacial<br>acetic acid distilled<br>over KMnO <sub>4</sub> , pre-<br>dried reagents,<br>stoichiometric educt<br>ratios kept at all time<br>during preparation | $< 1.25 \cdot 10^{-4}$ | n.a. | Anton Paar<br>DMA 4100 M                                      | TA instruments<br>AR-G2<br>controlled stress<br>cone and plate<br>rheometer | impedance<br>measurement at<br>25 °C at (0.1 and<br>1) MHz with a<br>Solartron 1260<br>response analyzer | no information<br>about atmosphere<br>during<br>measurements, no<br>temperatures given<br>for density and<br>viscosity |
| Yuan et al.<br><i>J. Chem.</i><br><i>Eng. Data</i><br><b>2007</b> , 52,<br>596-599.           | [HEA]Fmt,<br>[HEA]Ac,<br>[TEA]Ac | amines distilled,<br>reaction of<br>equimolar amounts<br>of educts dissolved<br>in ethanol,<br>subsequent solvent<br>evaporation, stir<br>with activated<br>carbon, filter and<br>final vacuum drying<br>at 50 °C for 48 h                                        | $< 1.0 \cdot 10^{-3}$  | n.a. | 5 mL<br>pycnometer,<br>absolute<br>uncertainty<br>$\pm 0.001$ | NDJ-1 rotary<br>type<br>viscometer,<br>absolute<br>uncertainty $\pm 1$      | DDS-307<br>conductivity<br>meter, absolute<br>uncertainty $\pm 0.1$                                      | All measurements<br>at 298.2 K with<br>absolute<br>uncertainty of<br>$\pm 0.1$ K                                       |
